# Supplementary material for: NALCN is a potential biomarker and therapeutic target in human cancers
Source: Front Genet. 2023 Apr 19;14:1164707. doi: 10.3389/fgene.2023.1164707 (PMC10154523; doi:10.3389/fgene.2023.1164707)
Supplement: Supplementary file 1 [file Table2.XLSX]

## Sheet: STRING
UNC79
UNC80
FAM155A
TACR1
NTS
SIK3
TAC1
CDH8
SIK2
TLN2
ITSN2
KCNMA1
OR4X2
CASR
OR4B1
SCN3B
TLN1
CACNA1A
SCN2B
KIAA1107
SCN1A
CHRM3
CACNB4
CACNA1B
ZIM2
CACNA2D1
FRRS1
WDR64
CACNB2
MAGEA6
KCTD3
LGI2
C2CD4A
NAV2
FAM155B
SCN5A
ZYG11B
CACNA2D3
FBXL13
CALM1
KCNK3
CACNA1D
SCN2A
C5orf47
CALM2
CALM3
SCN9A
ANO3
GREB1L
FGF14

## Sheet: GeneMANIA
UNC80
UNC79
PRSS12
PRSS22
PSMD11
TPR
CHRM3
CADM4
KCNG4
KCNV2
KCNF1
ZNF322
LRRC4B
GBX2
MUC12
RGS11
GALR1
KCNQ4
PCDHGB1
KIAA1109
