# Supplementary material for: NALCN is a potential biomarker and therapeutic target in human cancers
Source: Front Genet. 2023 Apr 19;14:1164707. doi: 10.3389/fgene.2023.1164707 (PMC10154523; doi:10.3389/fgene.2023.1164707)
Supplement: Supplementary file 2 [file Table1.XLSX]

## Sheet: Sheet1
Sample ID	Cancer Type Detailed	Protein Change	Mutation Type	Copy	Allele Freq (T)	Mut in Sample
SP17430	Colorectal Adenocarcinoma	D704H	Missense	Amp	0.09	83
SP135182	Tubular Stomach Adenocarcinoma	D704Y	Missense	Amp	0.14	200
